# Supplementary material for: An amiloride derivative is active against the F1Fo-ATP synthase and cytochrome bd oxidase of Mycobacterium tuberculosis
Source: PubMed Central journal article supplement (PMC8873251; doi:10.1038/s42003-022-03110-8), 2022-02-24
Supplement: 42003_2022_3110_MOESM1_ESM.pdf [file 42003_2022_3110_MOESM1_ESM.pdf]

1 **Supplementary Information for:**

2  
3 **An amiloride derivative is active against the F<sub>1</sub>F<sub>o</sub>-**  
4 **ATP synthase and cytochrome *bd* oxidase of**  
5 ***Mycobacterium tuberculosis***

6  
7 **Kiel Hards<sup>1,2\*</sup>, Chen-Yi Cheung<sup>1\*</sup>, Natalie Waller<sup>1</sup>, Cara Adolph<sup>1</sup>, Laura**  
8 **Keighley<sup>1</sup>, Zhi Shean Tee<sup>1</sup>, Liam K. Harold<sup>1,2</sup>, Ayana Menorca<sup>1</sup>, Richard S.**  
9 **Bujaroski<sup>3,4</sup>, Benjamin J. Buckley<sup>3,4</sup>, Joel D. A. Tyndall<sup>5</sup>, Matthew B. McNeil<sup>1,2</sup>,**  
10 **Kyu Y. Rhee<sup>6</sup>, Helen K. Opel-Reading<sup>7</sup>, Kurt Krause<sup>2,7</sup>, Laura Preiss<sup>8,9</sup>, Julian D.**  
11 **Langer<sup>10</sup>, Thomas Meier<sup>11,12</sup>, Erik J. Hasenoehr<sup>13</sup>, Michael Berney<sup>13</sup>, Michael J.**  
12 **Kelso<sup>3,4</sup> and Gregory M. Cook<sup>1,2</sup>**

13  
14 1. Department of Microbiology and Immunology, University of Otago, Dunedin, New Zealand

15 2. Maurice Wilkins Centre for Molecular Biodiscovery, The University of Otago, Dunedin,  
16 New Zealand

17 3. Molecular Horizons and School of Chemistry and Molecular Bioscience, University of  
18 Wollongong, Wollongong, Australia

19 4. Illawarra Health and Medical Research Institute, Wollongong, Australia

20 5. School of Pharmacy, University of Otago, Dunedin, New Zealand

21 6. Weill Department of Medicine, Weill Cornell Medical College, New York, United States

22 7. Department of Biochemistry, University of Otago, Dunedin, New Zealand

23 8. Department of Structural Biology, Max-Planck Institute of Biophysics, Frankfurt am Main,  
24 Germany

25 9. Octapharma Biopharmaceuticals GmbH, Heidelberg, Germany

26 10. Department of Molecular Membrane Biology, Max-Planck Institute of Biophysics,  
27 Frankfurt am Main, Germany

28 11. Department of Life Sciences, Imperial College London, London, United Kingdom

29 12. Private University in the Principality of Liechtenstein, Triesen, Liechtenstein

30 13. Department of Microbiology and Immunology, Albert Einstein College of Medicine, New  
31 York, USA

32  
33 \*These authors contributed equally

34 Address correspondence to: [Greg.cook@otago.ac.nz](mailto:Greg.cook@otago.ac.nz) or [mkelso@uow.edu.au](mailto:mkelso@uow.edu.au)

35 Keywords: Tuberculosis, F<sub>1</sub>F<sub>o</sub>-ATP synthase, cytochrome *bd*, antibiotics

36

## 37 Supplementary Table 1: Bacterial strains and plasmids used in this study

38

| Strain or Plasmid              | Description                                                                                                                     | Source     |
|--------------------------------|---------------------------------------------------------------------------------------------------------------------------------|------------|
| <i>E. coli</i> strains         |                                                                                                                                 |            |
| ATCC 10536                     | <i>E. coli</i> quality control strain                                                                                           | ATCC       |
| <i>S. aureus</i> strains       |                                                                                                                                 |            |
| ATCC 6538                      | <i>S. aureus</i> quality control strain                                                                                         | ATCC       |
| <i>E. faecalis</i> strains     |                                                                                                                                 |            |
| JH2-2                          | Laboratory strain, plasmid-free; rif <sup>r</sup> , fs <sup>r</sup>                                                             | 1          |
| <i>M. smegmatis</i> strains    |                                                                                                                                 |            |
| mc <sup>2</sup> 155            | Electrocompetent wild-type strain of <i>M. smegmatis</i>                                                                        | 2          |
| $\Delta$ <i>cyd</i>            | mc <sup>2</sup> 155 with a markerless in frame deletion in the <i>cydAB</i> gene                                                | 3          |
| $\Delta$ <i>qcr</i>            | mc <sup>2</sup> 155 with a markerless in frame deletion in the <i>qcrB</i> gene                                                 | 4          |
| <i>M. tuberculosis</i> strains |                                                                                                                                 |            |
| H37Rv                          | <i>M. tuberculosis</i> reference strain                                                                                         |            |
| mc <sup>2</sup> 6230           | Avirulent auxotrophic <i>M. tuberculosis</i> mutant ( $\Delta$ <i>RD1</i> $\Delta$ <i>panCD</i> ). Wild-type for this study.    | 5          |
| mc <sup>2</sup> 6206           | Avirulent auxotrophic <i>M. tuberculosis</i> mutant ( $\Delta$ <i>leuCD</i> $\Delta$ <i>panCD</i> ).                            | 6          |
| AtpE(A63P)                     | mc <sup>2</sup> 6206 with a G to C SNP at position 187 bp <i>atpE</i> .                                                         | This study |
| Rv0678(G65fs)                  | mc <sup>2</sup> 6206 with a single nucleotide deletion at position 193 bp of <i>rv0678</i> . Resulting protein is frameshifted. | This study |
| Rv3006(F134S)                  | mc <sup>2</sup> 6230 with a X to X SNP at position X of Rv3006.                                                                 | This study |

|                                   |                                                                                                          |            |
|-----------------------------------|----------------------------------------------------------------------------------------------------------|------------|
| Rv3006(R36S)                      | mc <sup>2</sup> 6230 with a X to X SNP at position X of Rv3006.                                          | This study |
| <i>Mycobacterium bovis</i><br>BCG | Pasteur 1173P2 (NC_008769.1)                                                                             | 7          |
| Plasmids                          |                                                                                                          |            |
| pJLR965                           | CRISPRi cloning vector for <i>M. tuberculosis</i>                                                        | 8          |
| pCi73                             | pJLR965 containing sgRNA targeting <i>atpB</i> of <i>M. tuberculosis</i>                                 | 9          |
| pCi7                              | pJLR965 containing sgRNA targeting <i>mmpL3</i> of <i>M. tuberculosis</i>                                | 10         |
| pYUB28b                           | Episomal expression vector for mycobacteria                                                              | 11         |
| pLHcyd                            | pYUB28b with <i>rv_1623c-rv1620c</i> ( <i>cydABDC</i> ), containing C-terminal FLAG tag on <i>cydB</i> . | 12         |

---

41 Supplementary Table 2: IC<sub>50</sub> values of the indicated compounds towards *M.*  
42 *tuberculosis* cytochrome *bd* oxidase.

| Compound    | IC <sub>50</sub> [95% CI] (μM) | IC <sub>50</sub> (fold MIC) | OCR at 1xMIC (%) |
|-------------|--------------------------------|-----------------------------|------------------|
| HM2-16F     | 21.16 [10.88-39.09]            | 2.11                        | 58.86            |
| BDQ         | 11.71 [4.57-27.03]             | 58.44                       | 83.04            |
| Aurachin D* | 0.15 [0.091-0.27]              | 0.019                       | 3.70             |

43 \* The MIC of Aurachin D is determined from MIC testing against *M. smegmatis* Δ*qcr*  
44 mutant (supplementary Table 1).

45

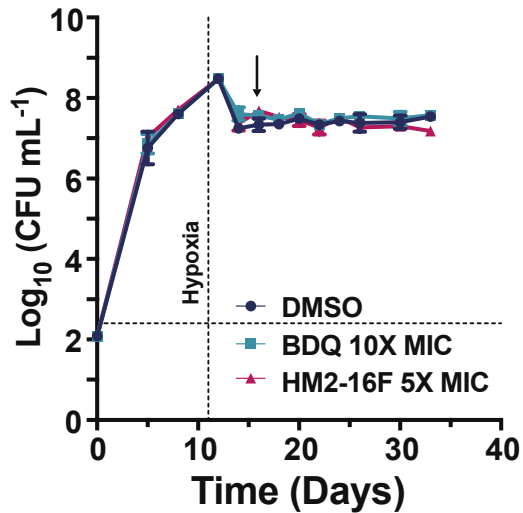

46

47 **Supplementary Figure 1:** Survival of *M. tuberculosis* after treatment with HM2-16F

48 (20  $\mu$ M, 5 $\times$  MIC) and bedaquiline (BDQ 2  $\mu$ M, 10 $\times$  MIC). Hypoxia was achieved as

49 cultures exhausted oxygen in the sealed serum vials as indicated by the

50 decolorization of methylene blue (vertical dotted line) <sup>12</sup>. Compounds were added at

51 the indicated arrow. The horizontal dotted line indicates the limit of detection for all,

52 but the first time point, where the limit of detection was 10 CFU mL<sup>-1</sup>. Error bars

53 indicate standard deviation from n = 3 biologically independent experiments.

54

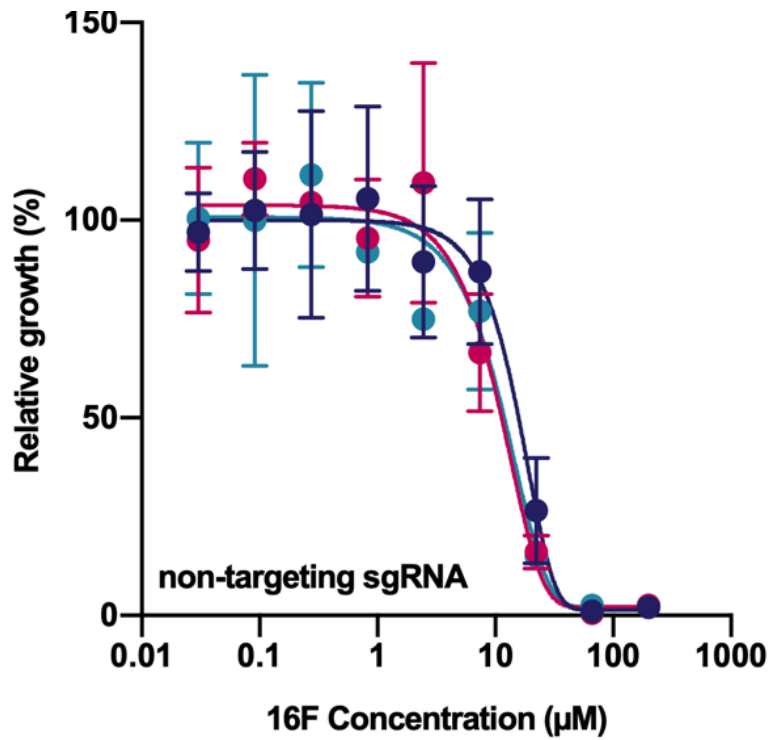

55

56

57

58

59

60

61

62

**Supplementary Figure 2:** Control gene knockdown with a non-targeting sgRNA (pJLR965) was induced with the indicated amounts of ATc and the MIC of HM2-16F was determined. Error bars indicate standard deviation from n = 3 biologically independent experiments.

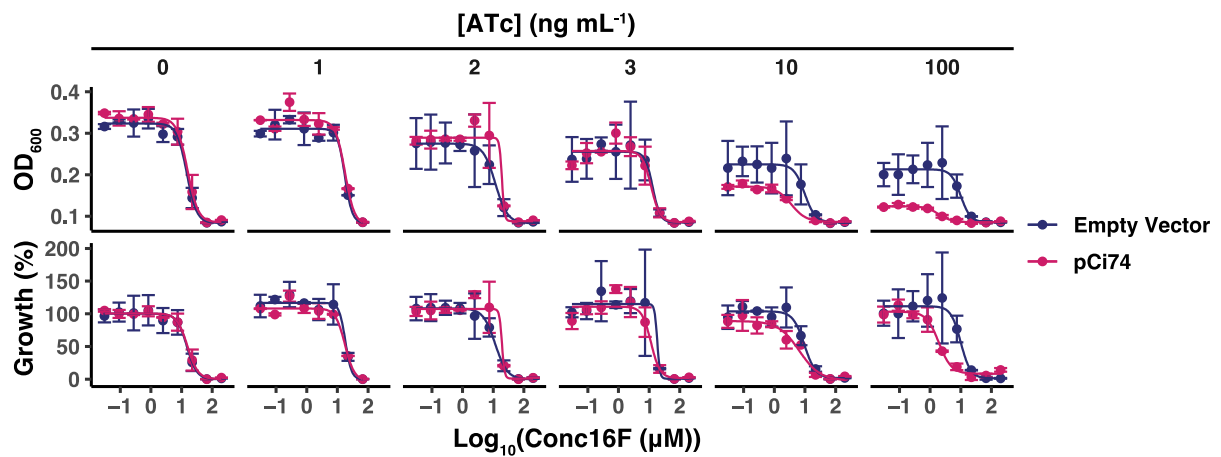

63

64 **Supplementary Figure 3:** Knockdown of the ATP synthase operon (*atpB* – pCi74)  
 65 was induced with the indicated amounts of ATc, in the indicated strains and the  
 66 growth relative to the vehicle control was determined. Raw OD<sub>600</sub> absorbance values  
 67 (path length = 0.33 cm) are plotted as indicated. Error bars indicate standard  
 68 deviation from n = 3 biologically independent experiments.

69 .

70

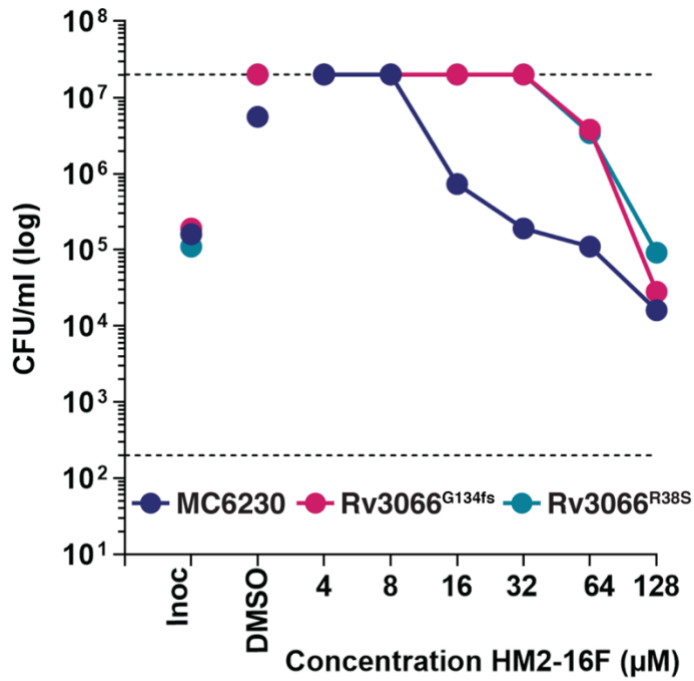

71

72

73 **Supplementary Figure 4:** Cell killing of the indicated *M. tuberculosis* strains after 10

74 days incubation with HM2-16F at 5x MIC. The CFU at day 0 is indicated (Inoc).

75 MC6206 = wild-type; HM2-16-resistant mutants, transcription factor Rv3066 G134fs

76 and R38S (Supplementary Table 1).

77



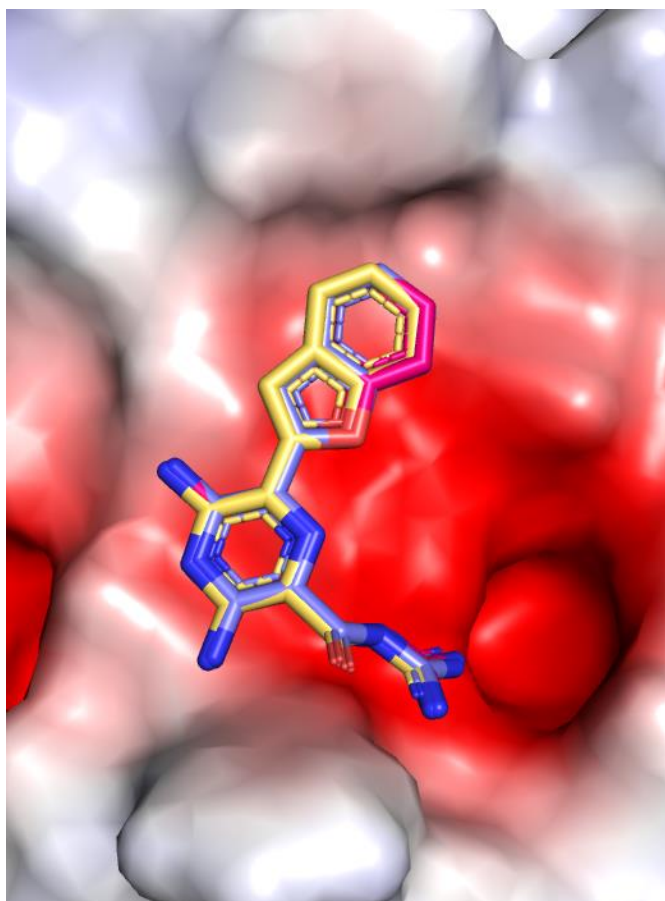

78

79 **Supplementary Figure 5:** The top three docked poses for HM2-16F (blue, yellow,  
80 pink) docked into the BDQ-binding site of mycobacterial F<sub>1</sub>F<sub>o</sub>-ATP synthase c-ring  
81 (PDB ID: 4V1F). The protein is shown as an electrostatic potential surface (red –  
82 electronegative, white – neutral, blue – electropositive; generated in PyMOL).

83

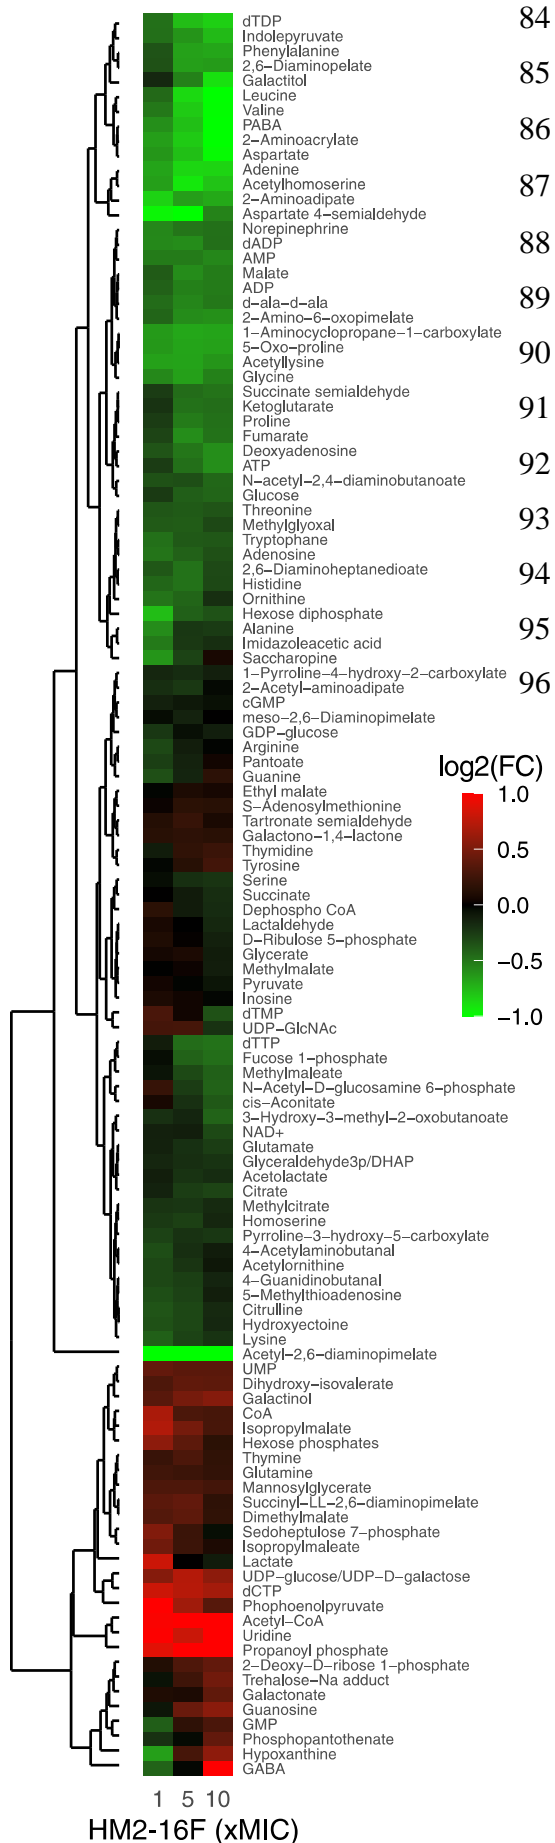

84 **Supplementary Figure 6: Heatmap**  
 85 metabolite profile following 1d exposure  
 86 of *M. tuberculosis* H37Rv to increasing  
 87 concentrations of HM2-16F (1-10x MIC).  
 88 Columns represent individual treatments  
 89 as indicated. Rows denote individual  
 90 metabolites measured. Hierarchical  
 91 clustering was performed on the  
 92 Euclidean distance matrix of this data  
 93 and the resulting dendrogram and  
 94 heatmap was visualized with ggplot2 in  
 95 R. FC = Fold change.

97 **Supplementary References**

- 98 1. Jacob, A. E. & Hobbs, S. J. Conjugal Transfer of Plasmid-Borne Multiple  
99 Antibiotic Resistance in *Streptococcus faecalis* var. *zymogenes*. *J Bacteriol* **117**,  
100 360–372 (1974).
- 101 2. Snapper, S. B. *et al.* Isolation and characterization of efficient plasmid  
102 transformation mutants of *Mycobacterium smegmatis*. *Mol Microbiol* **4**, 1911–1919  
103 (1990).
- 104 3. Lu, X. *et al.* Pyrazolo[1,5-a]pyridine Inhibitor of the respiratory cytochrome *bcc*  
105 complex for the treatment of drug-resistant tuberculosis. *ACS Infect Dis* **5**, 239–  
106 249 (2019).
- 107 4. Chong SMS *et al.* Antituberculosis activity of the antimalaria cytochrome *bcc*  
108 oxidase inhibitor SCR0911. *ACS Infect Dis* **6**, 725-737 (2020).
- 109 5. Sambandamurthy, V. K. *et al.* A pantothenate auxotroph of *Mycobacterium*  
110 *tuberculosis* is highly attenuated and protects mice against tuberculosis. *Nat Med*  
111 **8**, 1171–1174 (2002).
- 112 6. Tufariello, J. M. *et al.* Enhanced specialized transduction using recombineering in  
113 *Mycobacterium tuberculosis*. *mBio* **5**, e01179-14 (2014).
- 114 7. Brosch, R. *et al.* Genome plasticity of BCG and impact on vaccine efficacy. *Proc*  
115 *Natl Acad Sci* **104**, 5596–5601 (2007).
- 116 8. Rock, J. M. *et al.* Programmable transcriptional repression in mycobacteria using  
117 an orthogonal CRISPR interference platform. *Nat Microbiol* **2**, 16274–16274  
118 (2017).
- 119 9. McNeil, M. B., Ryburn, H. W. K., Harold, L. K., Tirados, J. F. & Cook, G. M.  
120 Transcriptional inhibition of the F<sub>1</sub>F<sub>o</sub>-type ATP synthase has bactericidal  
121 consequences on the viability of mycobacteria. *Antimicrob Agents Chemother* **64**,  
122 e00492-20 (2020).
- 123

- 124 10. McNeil, M. B. & Cook, G. M. Utilization of CRISPR interference to validate  
125 MmpL3 as a drug target in *Mycobacterium tuberculosis*. *Antimicrob Agents*  
126 *Chemother* **63**, e00629-19 (2019).
- 127 11. Bashiri, G., Rehan, A. M., Greenwood, D. R., Dickson, J. M. J. & Baker, E. N.  
128 Metabolic engineering of cofactor F<sub>420</sub> production in *Mycobacterium smegmatis*.  
129 *PLoS ONE* **5**, e15803–e15803 (2010).
- 130 12. Safarian, S. *et al.* The cryo-EM structure of the bd oxidase from *Mycobacterium*  
131 *tuberculosis* reveals a unique structural framework and enables rational drug  
132 design to combat tuberculosis.. *Nat Commun* **12**, 5236 (2021).
- 133 13. Berney, M., Weimar, M. R., Heikal, A. & Cook, G. M. Regulation of proline  
134 metabolism in mycobacteria and its role in carbon metabolism under hypoxia. *Mol*  
135 *Microbiol* **84**, 664–681 (2012).

136  
137
