# Supplementary material for: An amiloride derivative is active against the F1Fo-ATP synthase and cytochrome bd oxidase of Mycobacterium tuberculosis
Source: PubMed Central journal article supplement (PMC8873251; doi:10.1038/s42003-022-03110-8), 2022-02-24
Supplement: 42003_2022_3110_MOESM2_ESM.pdf [file 42003_2022_3110_MOESM2_ESM.pdf]

## Description of Additional Supplementary Files

**File name:** Supplementary Data 1

**Description:** Raw metabolomic data.

**File name:** Supplementary Data 2

**Description:** Source data for main figures.
